# Supplementary material for: β Oscillations of Dorsal STN as a Potential Biomarker in Parkinson’s Disease Motor Subtypes: An Exploratory Study
Source: MDPI journal article supplement (doi:10.3390/brainsci13050737), 2023-04-28
Supplement: s1 [file s1]

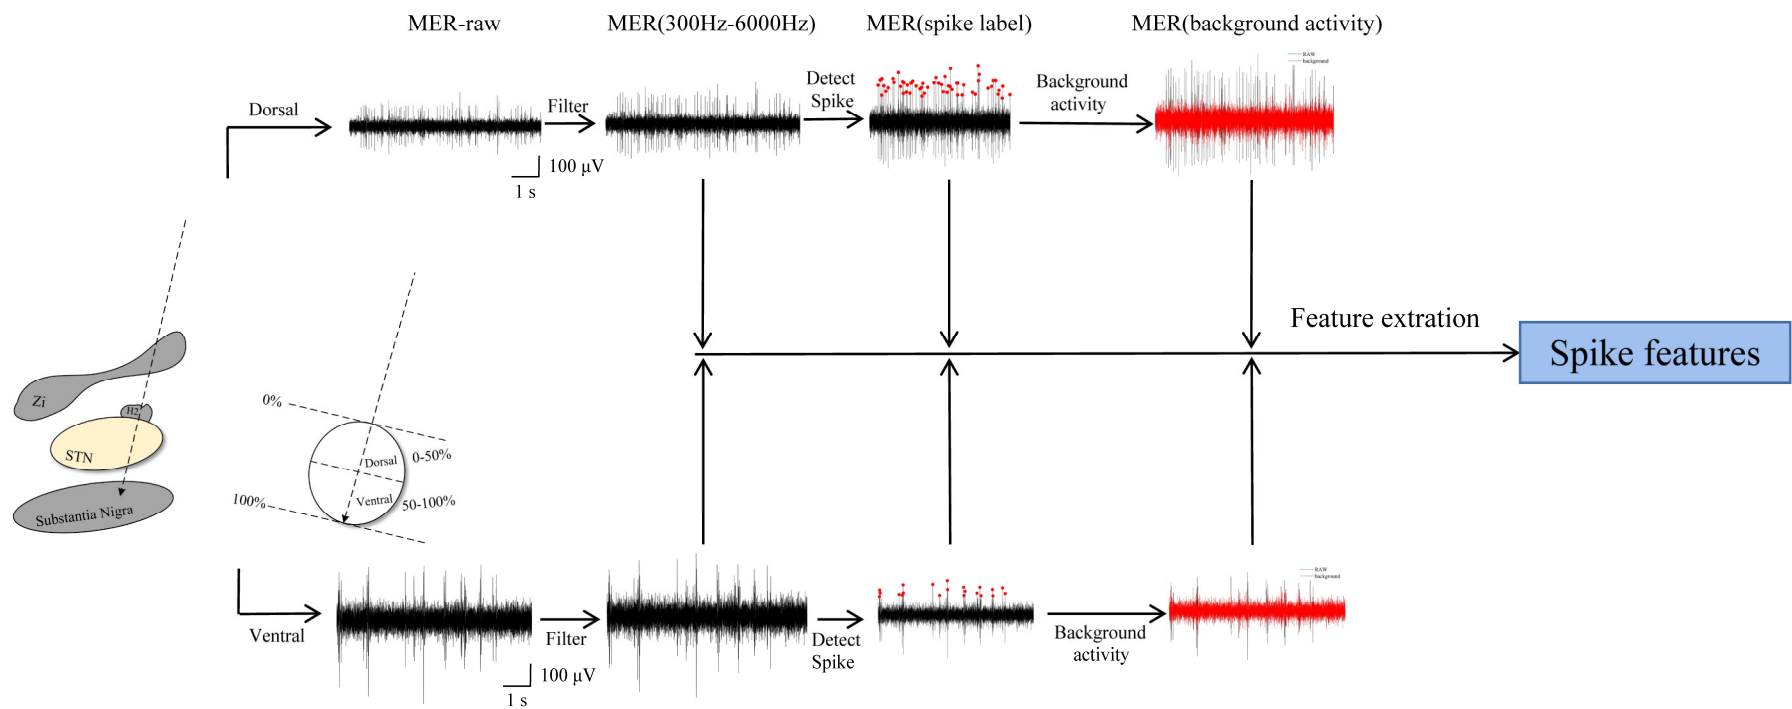

Figure S1. MER feature extraction flow chart

Table S1 Comparison of three neural markers in the dorsal and ventral STN regions between the PIGD and TD groups. Data are presented as mean (95% confidence interval).

|             | PIGD group ( $n = 14$ ) | TD group ( $n = 9$ ) | <i>P</i> value    |
|-------------|-------------------------|----------------------|-------------------|
| FR Dorsal   | $37.45 \pm 11.71$       | $36.56 \pm 8.30$     | 0.84 <sup>b</sup> |
| FR Ventral  | $36.78 \pm 12.29$       | $35.34 \pm 6.99$     | 0.75 <sup>b</sup> |
| P-value     | 0.88 <sup>b</sup>       | 0.74 <sup>b</sup>    |                   |
| MBI Dorsal  | $1.56 \pm 0.74$         | $1.67 \pm 1.44$      | 0.81 <sup>b</sup> |
| MBI Ventral | $1.94 \pm 1.59$         | $1.73 \pm 1.53$      | 0.75 <sup>b</sup> |
| P-value     | 0.43 <sup>b</sup>       | 0.93 <sup>b</sup>    |                   |
| AI Dorsal   | $0.25 \pm 0.08$         | $0.24 \pm 0.07$      | 0.88 <sup>b</sup> |
| AI Ventral  | $0.29 \pm 0.07$         | $0.29 \pm 0.09$      | 0.96 <sup>b</sup> |
| P-value     | 0.17 <sup>b</sup>       | 0.26 <sup>b</sup>    |                   |

FR, firing rate; MBI, modified burst index; AI, asymmetry index;  
Differences between the two groups were analyzed using the *t* test<sup>b</sup>

Table S2 Results of the correlation analysis between MER characteristics and clinical characteristics in the PIGD group (Med-off).

| MER features        | H-Y                | UPDRS III (Med-off) |              |             |              |                |              |
|---------------------|--------------------|---------------------|--------------|-------------|--------------|----------------|--------------|
|                     |                    | UPDRS III           | Tremor       | Rigidity    | Bradykinesia | Axial symptoms | Gait         |
| Power_Theta         | -0.162/0.579       | -0.231/0.427        | -0.452/0.104 | -0.34/0.234 | -0.388/0.17  | 0.02/0.946     | -0.009/0.975 |
| Power_Alpha         | 0.296/0.304        | -0.057/0.846        | -0.086/0.769 | 0.082/0.78  | -0.133/0.65  | -0.018/0.952   | -0.172/0.557 |
| Power_Beta          | 0.482/0.081        | 0.002/0.994         | 0.217/0.456  | 0.214/0.463 | -0.1/0.734   | -0.183/0.531   | -0.149/0.612 |
| Power_Gamma         | 0.116/0.693        | 0.073/0.805         | -0.188/0.519 | 0.176/0.548 | 0.024/0.934  | 0.011/0.97     | -0.2/0.494   |
| Power_Dorsal_Theta  | -0.09/0.759        | -0.081/0.782        | -0.235/0.419 | -0.24/0.408 | -0.162/0.58  | 0.156/0.594    | 0.334/0.243  |
| Power_Dorsal_Alpha  | -0.018/0.951       | -0.326/0.256        | -0.295/0.306 | 0.182/0.532 | -0.493/0.073 | -0.004/0.988   | 0.162/0.579  |
| Power_Dorsal_Beta   | 0.116/0.693        | -0.273/0.401        | 0.297/0.345  | 0.178/0.603 | -0.315/0.272 | -0.433/0.122   | -0.214/0.464 |
| Power_Dorsal_Gamma  | 0.054/0.854        | 0.099/0.736         | -0.206/0.479 | 0.189/0.517 | 0.033/0.91   | 0.078/0.791    | -0.074/0.801 |
| Power_Ventral_Theta | -0.327/0.253       | -0.11/0.708         | -0.346/0.226 | 0.258/0.373 | -0.249/0.391 | 0.105/0.721    | -0.167/0.568 |
| Power_Ventral_Alpha | 0.24/0.409         | 0.125/0.669         | 0.035/0.904  | 0.138/0.638 | 0.007/0.982  | 0.109/0.71     | -0.195/0.504 |
| Power_Ventral_Beta  | <b>.575/0.032*</b> | -0.029/0.923        | 0.049/0.868  | 0.26/0.369  | -0.064/0.827 | -0.252/0.384   | -0.19/0.515  |
| Power_Ventral_Gamma | 0.245/0.399        | -0.015/0.958        | -0.024/0.934 | 0.049/0.868 | -0.055/0.851 | -0.109/0.71    | -0.325/0.257 |
| Firing rate         | 0.08/0.786         | -0.119/0.686        | 0.144/0.623  | -0.129/0.66 | -0.027/0.928 | -0.246/0.397   | -0.097/0.74  |
| Asymmetry_Index     | 0.013/0.965        | -0.262/0.366        | -0.153/0.602 | 0.138/0.638 | -0.198/0.498 | -0.223/0.443   | 0.005/0.987  |
| MBI                 | -0.332/0.246       | 0.057/0.846         | 0.324/0.259  | 0.196/0.502 | 0.036/0.904  | 0.185/0.526    | 0.237/0.415  |

Values are presented as rho ( $\rho$ )/ $P$  value. \*Represented a statistical correlation ( $P < 0.05$ ). MBI, modified burst index; H&Y, Hoehn and Yahr stages, UPDRS, Unified Parkinson's Disease Rating Scale.

Table S3 Results of the correlation analysis between MER characteristics and clinical characteristics in the TD group (Med-off).

| MER features        | H-Y          | UPDRS III (Med-off) |              |             |                      |                |              |
|---------------------|--------------|---------------------|--------------|-------------|----------------------|----------------|--------------|
|                     |              | UPDRS III           | Tremor       | Rigidity    | Bradykinesia         | Axial symptoms | Gait         |
| Power_Theta         | -0.156/0.689 | -0.159/0.683        | 0.251/0.515  | 0.017/0.965 | -0.552/0.123         | 0.06/0.879     | -0.33/0.385  |
| Power_Alpha         | -0.092/0.814 | -0.126/0.748        | 0.393/0.295  | 0.156/0.68  | <b>-.695/0.038*</b>  | 0.221/0.567    | -0.266/0.489 |
| Power_Beta          | -0.294/0.443 | -0.502/0.168        | 0.192/0.62   | 0.494/0.177 | <b>-.778/0.014*</b>  | 0.009/0.983    | -0.422/0.258 |
| Power_Gamma         | -0.128/0.742 | -0.628/0.07         | 0.059/0.881  | 0.502/0.168 | <b>-.778/0.014*</b>  | -0.043/0.913   | -0.395/0.293 |
| Power_Dorsal_Theta  | -0.092/0.814 | -0.126/0.748        | 0.393/0.295  | 0.351/0.233 | <b>-.695/0.038*</b>  | 0.221/0.567    | -0.266/0.489 |
| Power_Dorsal_Alpha  | -0.156/0.689 | -0.092/0.814        | 0.351/0.354  | 0.017/0.965 | -0.611/0.081         | 0.17/0.661     | -0.266/0.489 |
| Power_Dorsal_Beta   | -0.138/0.724 | <b>-.678/0.045*</b> | -0.075/0.847 | 0.545/0.129 | <b>-.770/0.015*</b>  | 0.009/0.953    | -0.284/0.458 |
| Power_Dorsal_Gamma  | -0.229/0.553 | -0.603/0.086        | -0.184/0.635 | 0.579/0.102 | -0.151/0.699         | -0.375/0.321   | -0.339/0.371 |
| Power_Ventral_Theta | -0.367/0.331 | -0.201/0.604        | 0.05/0.898   | 0.153/0.694 | -0.109/0.781         | -0.383/0.309   | -0.477/0.194 |
| Power_Ventral_Alpha | 0.119/0.76   | 0.343/0.366         | 0.46/0.213   | 0.128/0.743 | -0.31/0.417          | 0.068/0.862    | -0.202/0.603 |
| Power_Ventral_Beta  | 0.193/0.619  | 0.042/0.915         | 0.594/0.092  | 0.026/0.948 | -0.36/0.342          | 0.434/0.243    | 0.119/0.76   |
| Power_Ventral_Gamma | 0.009/0.981  | -0.351/0.354        | 0.326/0.391  | 0.272/0.478 | <b>-.820/0.007**</b> | 0.358/0.345    | -0.092/0.814 |
| Firing rate         | 0.064/0.87   | -0.192/0.62         | 0.343/0.366  | 0.451/0.223 | 0.067/0.864          | -0.477/0.194   | 0.266/0.489  |
| Asymmetry_Index     | -0.395/0.293 | 0.326/0.391         | 0.435/0.242  | 0.026/0.948 | 0.167/0.667          | 0.255/0.507    | 0.284/0.458  |
| MBI                 | -0.156/0.689 | 0.318/0.404         | 0.1/0.797    | 0.179/0.645 | <b>.720/0.029*</b>   | -0.4/0.286     | -0.009/0.981 |

Values are presented as rho ( $\rho$ )/ $P$  value. \*Represented a statistical correlation ( $P < 0.05$ ). MBI, modified burst index; H&Y, Hoehn and Yahr stages; UPDRS, Unified Parkinson's Disease Rating Scale.

Table S4 Results of the correlation analysis between MER characteristics and clinical characteristics in the PIGD group (DBS-on).

| MER features        | UPDRS III (DBS-on) |               |              |              |                |              |
|---------------------|--------------------|---------------|--------------|--------------|----------------|--------------|
|                     | UPDRS III          | Tremor        | Rigidity     | Bradykinesia | Axial symptoms | Gait         |
| Power_Theta         | 0.307/0.286        | -0.128/0.664  | -0.104/0.724 | 0.228/0.433  | 0.029/0.921    | 0.257/0.375  |
| Power_Alpha         | 0.007/0.982        | 0.313/0.275   | -0.079/0.79  | 0.003/0.993  | -0.038/0.897   | 0.087/0.767  |
| Power_Beta          | -0.249/0.39        | 0.039/0.895   | -0.185/0.527 | -0.202/0.488 | -0.284/0.325   | -0.195/0.504 |
| Power_Gamma         | 0.203/0.487        | -0.183/0.531  | 0.06/0.838   | 0.187/0.522  | 0.038/0.897    | 0.257/0.375  |
| Power_Dorsal_Theta  | 0.39/0.168         | -0.291/0.313  | 0.224/0.441  | 0.182/0.534  | 0.331/0.248    | 0.267/0.356  |
| Power_Dorsal_Alpha  | -0.026/0.928       | -0.069/0.814  | -0.081/0.784 | -0.085/0.774 | -0.141/0.631   | -0.008/0.979 |
| Power_Dorsal_Beta   | -0.359/0.207       | -0.141/0.68   | -0.307/0.285 | -0.3/0.298   | -0.355/0.212   | -0.352/0.217 |
| Power_Dorsal_Gamma  | 0.088/0.764        | -0.194/0.506  | -0.007/0.981 | 0.069/0.814  | -0.034/0.909   | 0.144/0.624  |
| Power_Ventral_Theta | 0.104/0.724        | 0.23/0.429    | -0.291/0.313 | 0.233/0.423  | -0.143/0.626   | 0.092/0.753  |
| Power_Ventral_Alpha | -0.049/0.869       | 0.41/0.145    | -0.224/0.441 | 0.059/0.841  | -0.083/0.779   | 0.032/0.934  |
| Power_Ventral_Beta  | -0.172/0.557       | 0.028/0.925   | -0.085/0.771 | -0.254/0.382 | -0.194/0.505   | -0.11/0.707  |
| Power_Ventral_Gamma | 0.262/0.365        | 0.064/0.829   | 0.028/0.925  | 0.295/0.307  | 0.056/0.85     | 0.237/0.351  |
| Firing rate         | 0.238/0.412        | -.757**/0.002 | 0.298/0.301  | 0.12/0.682   | 0.118/0.687    | -0.08/0.787  |
| Asymmetry_Index     | 0.026/0.928        | -0.529/0.052  | 0.095/0.747  | -0.182/0.534 | -0.002/0.994   | -0.103/0.727 |
| MBI                 | 0.157/0.593        | -0.41/0.145   | 0.189/0.517  | 0.284/0.325  | 0.181/0.536    | 0.028/0.924  |

Values are presented as rho ( $\rho$ )/ $P$  value. \*Represented a statistical correlation ( $P < 0.05$ ). MBI, modified burst index; H&Y, Hoehn and Yahr stages; UPDRS, Unified Parkinson's Disease Rating Scale.

Table S5 Results of the correlation analysis between MER characteristics and clinical characteristics in the TD group (DBS-on).

| MER features        | UPDRS III (DBS-on) |              |              |              |                    |              |
|---------------------|--------------------|--------------|--------------|--------------|--------------------|--------------|
|                     | UPDRS III          | Tremor       | Rigidity     | Bradykinesia | Axial symptoms     | Gait         |
| Power_Theta         | 0.226/0.559        | -0.317/0.406 | -0.122/0.754 | 0.565/0.113  | 0.441/0.235        | -0.091/0.815 |
| Power_Alpha         | 0.075/0.847        | -0.386/0.305 | -0.122/0.754 | 0.414/0.269  | 0.373/0.323        | -0.091/0.815 |
| Power_Beta          | -0.184/0.635       | -0.188/0.628 | -0.507/0.163 | -0.008/0.983 | 0.373/0.323        | -0.183/0.638 |
| Power_Gamma         | -0.444/0.232       | -0.248/0.521 | -0.551/0.124 | -0.262/0.496 | 0.119/0.761        | -0.456/0.217 |
| Power_Dorsal_Theta  | 0.075/0.847        | -0.386/0.305 | -0.122/0.754 | 0.414/0.269  | 0.373/0.323        | -0.091/0.815 |
| Power_Dorsal_Alpha  | 0.159/0.683        | -0.297/0.438 | -0.122/0.754 | 0.489/0.181  | 0.373/0.323        | -0.091/0.815 |
| Power_Dorsal_Beta   | -0.31/0.417        | -0.03/0.94   | -0.665/0.051 | -0.228/0.555 | 0.136/0.728        | -0.456/0.217 |
| Power_Dorsal_Gamma  | -0.017/0.966       | 0.119/0.761  | -0.481/0.19  | -0.068/0.863 | 0.39/0.3           | -0.183/0.638 |
| Power_Ventral_Theta | 0.318/0.404        | -0.129/0.741 | -0.14/0.72   | 0.608/0.083  | 0.458/0.215        | -0.091/0.815 |
| Power_Ventral_Alpha | 0.134/0.731        | -0.574/0.106 | 0.14/0.72    | 0.489/0.181  | 0.424/0.256        | 0.091/0.815  |
| Power_Ventral_Beta  | 0.393/0.295        | -0.297/0.438 | 0.07/0.858   | 0.439/0.237  | <b>.763/0.017*</b> | 0.548/0.127  |
| Power_Ventral_Gamma | -0.251/0.515       | -0.188/0.628 | -0.393/0.295 | -0.152/0.696 | 0.22/0.569         | -0.183/0.638 |
| Firing rate         | -0.109/0.781       | 0.149/0.703  | -0.411/0.272 | -0.245/0.526 | 0.153/0.695        | 0.274/0.476  |
| Asymmetry_Index     | 0.51/0.16          | 0.634/0.067  | -0.114/0.771 | 0.279/0.468  | 0.39/0.3           | 0.456/0.217  |
| MBI                 | 0.184/0.635        | 0.129/0.741  | 0.262/0.495  | 0.228/0.555  | -0.051/0.897       | 0.091/0.815  |

Values are presented as rho ( $\rho$ )/ $P$  value. \*Represented a statistical correlation ( $P < 0.05$ ). MBI, modified burst index; H&Y, Hoehn and Yahr stages; UPDRS, Unified Parkinson's Disease Rating Scale.

Table S6 Results of correlation analysis between dorsal beta PSD and UPDRS part III in the PIGD group.

| UPDRS Part III | Power_Dorsal_Beta |               |                          |
|----------------|-------------------|---------------|--------------------------|
|                | rho               | <i>p</i>      | <i>p</i> (FDR-Corrected) |
| <b>med-off</b> |                   |               |                          |
| UPDRS III      | -0.273            | 0.401         | 0.057                    |
| Tremor         | 0.297             | 0.345         | 0.058                    |
| Rigidity       | 0.178             | 0.603         | 0.068                    |
| Bradykinesia   | -0.315            | 0.272         | 0.066                    |
| Axial symptoms | -0.433            | 0.122         | 0.069                    |
| Gait           | -0.214            | 0.464         | 0.060                    |
| <b>med-on</b>  |                   |               |                          |
| UPDRS III      | -0.081            | 0.782         | 0.078                    |
| Tremor         | 0.153             | 0.602         | 0.073                    |
| Rigidity       | -0.022            | 0.94          | 0.088                    |
| Bradykinesia   | -0.247            | 0.394         | 0.061                    |
| Axial symptoms | -0.582            | <b>0.029*</b> | <b>0.049*</b>            |
| Gait           | -0.506            | 0.065         | 0.055                    |
| <b>DBS-on</b>  |                   |               |                          |
| UPDRS III      | -0.359            | 0.207         | 0.088                    |
| Tremor         | -0.141            | 0.68          | 0.072                    |
| Rigidity       | -0.307            | 0.285         | 0.060                    |
| Bradykinesia   | -0.3              | 0.298         | 0.056                    |
| Axial symptoms | -0.355            | 0.212         | 0.072                    |
| Gait           | -0.352            | 0.217         | 0.061                    |

\*Represented a statistical correlation ( $P < 0.05$ ). UPDRS, Unified Parkinson's Disease Rating Scale, Power\_Dorsal\_Beta, the power spectral density of the dorsal beta band, FDR = false discovery rate

Table S7 Results of correlation analysis between dorsal beta PSD and UPDRS part III in the TD group.

| UPDRS Part III | Power_Dorsal_Beta |               |                          |
|----------------|-------------------|---------------|--------------------------|
|                | rho               | <i>p</i>      | <i>p</i> (FDR-Corrected) |
| <b>med-off</b> |                   |               |                          |
| UPDRS III      | -0.678            | <b>0.045*</b> | 0.073                    |
| Tremor         | -0.075            | 0.847         | 0.551                    |
| Rigidity       | 0.545             | 0.129         | 0.140                    |
| Bradykinesia   | -0.77             | <b>0.015*</b> | <b>0.049*</b>            |
| Axial symptoms | 0.009             | 0.953         | 0.517                    |
| Gait           | -0.284            | 0.458         | 0.373                    |
| <b>med-on</b>  |                   |               |                          |
| UPDRS III      | -0.717            | <b>0.03*</b>  | <b>0.029*</b>            |
| Tremor         | -0.261            | 0.498         | 0.193                    |
| Rigidity       | -0.603            | 0.086         | 0.056                    |
| Bradykinesia   | -0.828            | <b>0.006*</b> | <b>0.012*</b>            |
| Axial symptoms | 0.451             | 0.223         | 0.108                    |
| Gait           | 0.26              | 0.5           | 0.162                    |
| <b>DBS-on</b>  |                   |               |                          |
| UPDRS III      | -0.31             | 0.417         | 0.200                    |
| Tremor         | -0.03             | 0.94          | 0.225                    |
| Rigidity       | -0.665            | 0.051         | 0.073                    |
| Bradykinesia   | -0.228            | 0.555         | 0.200                    |
| Axial symptoms | 0.136             | 0.728         | 0.209                    |
| Gait           | -0.456            | 0.217         | 0.156                    |

\*Represented a statistical correlation ( $P < 0.05$ ). UPDRS, Unified Parkinson's Disease Rating Scale, Power\_Dorsal\_Beta, the power spectral density of the dorsal beta band, FDR = false discovery rate
